# Supplementary material for: The effect of experience in movement coordination with music on polyrhythmic production: Comparison between artistic swimmers and water polo players during eggbeater kick performance
Source: PubMed Central journal article supplement (PMC7447008; doi:10.1371/journal.pone.0238197), 2020-08-25
Supplement: pone.0238197.s001.pdf [file pone.0238197.s001.pdf]

S1 Table. Eggbeater kick frequency over three trials of artistic swimmers and water polo players in task1

| Participant | Artistic swimmers |       |       |                           | Water polo players |       |       |                           |
|-------------|-------------------|-------|-------|---------------------------|--------------------|-------|-------|---------------------------|
|             | Trial             | Mean  | SD    | Average over three trials | Trial              | Mean  | SD    | Average over three trials |
| 1           | 1                 | 68.10 | 2.20  | 69.6                      | 1                  | 74.45 | 3.67  | 75.73                     |
|             | 2                 | 70.05 | 3.27  |                           | 2                  | 76.51 | 5.26  |                           |
|             | 3                 | 70.65 | 2.97  |                           | 3                  | 76.22 | 4.824 |                           |
| 2           | 1                 | 86.25 | 5.63  | 89.48                     | 1                  | 70.23 | 3.55  | 69.64                     |
|             | 2                 | 92.49 | 2.52  |                           | 2                  | 70.00 | 1.73  |                           |
|             | 3                 | 89.71 | 3.11  |                           | 3                  | 68.71 | 2.27  |                           |
| 3           | 1                 | 86.94 | 2.18  | 84.92                     | 1                  | 82.66 | 4.60  | 83.28                     |
|             | 2                 | 85.37 | 2.40  |                           | 2                  | 83.50 | 3.01  |                           |
|             | 3                 | 82.45 | 3.67  |                           | 3                  | 83.68 | 6.19  |                           |
| 4           | 1                 | 83.82 | 2.74  | 85.49                     | 1                  | 95.75 | 7.57  | 93.06                     |
|             | 2                 | 86.13 | 2.28  |                           | 2                  | 90.86 | 8.54  |                           |
|             | 3                 | 86.54 | 1.79  |                           | 3                  | 92.57 | 8.81  |                           |
| 5           | 1                 | 76.49 | 4.81  | 76.43                     | 1                  | 72.49 | 1.99  | 71.91                     |
|             | 2                 | 75.46 | 5.37  |                           | 2                  | 71.72 | 1.72  |                           |
|             | 3                 | 77.34 | 4.12  |                           | 3                  | 71.54 | 2.26  |                           |
| 6           | 1                 | 90.64 | 8.20  | 87.1                      | 1                  | 62.58 | 2.42  | 62.14                     |
|             | 2                 | 85.09 | 7.23  |                           | 2                  | 62.46 | 2.06  |                           |
|             | 3                 | 85.56 | 7.45  |                           | 3                  | 61.37 | 2.06  |                           |
| 7           | 1                 | 87.20 | 6.70  | 86.65                     | 1                  | 68.65 | 2.75  | 70.67                     |
|             | 2                 | 84.86 | 7.00  |                           | 2                  | 71.79 | 2.20  |                           |
|             | 3                 | 87.89 | 14.92 |                           | 3                  | 71.56 | 3.17  |                           |
| 8           | 1                 | 81.53 | 6.60  | 78.87                     | 1                  | 80.44 | 1.97  | 83                        |
|             | 2                 | 78.81 | 5.05  |                           | 2                  | 83.37 | 2.89  |                           |
|             | 3                 | 76.28 | 4.35  |                           | 3                  | 85.18 | 2.60  |                           |
| 9           | 1                 | 86.42 | 3.24  | 86.43                     | 1                  | 58.84 | 2.52  | 57.96                     |
|             | 2                 | 86.88 | 3.27  |                           | 2                  | 57.14 | 2.85  |                           |
|             | 3                 | 85.99 | 3.69  |                           | 3                  | 57.91 | 2.52  |                           |
| <b>Mean</b> |                   |       | 4.70  | 82.78                     |                    |       | 3.56  | 74.15                     |
