# Supplementary material for: The effect of experience in movement coordination with music on polyrhythmic production: Comparison between artistic swimmers and water polo players during eggbeater kick performance
Source: PubMed Central journal article supplement (PMC7447008; doi:10.1371/journal.pone.0238197), 2020-08-25
Supplement: pone.0238197.s002.pdf [file pone.0238197.s002.pdf]

S2 Table. Eggbeater kick and circular arm movement frequency in task2: Normal-slow-fast task

| Participant | Artistic swimmers        |           |            |                                 |           |            | Water polo players       |           |            |                                 |           |            |
|-------------|--------------------------|-----------|------------|---------------------------------|-----------|------------|--------------------------|-----------|------------|---------------------------------|-----------|------------|
|             | Eggbeater kick frequency |           |            | Circular arm movement frequency |           |            | Eggbeater kick frequency |           |            | Circular arm movement frequency |           |            |
|             | 100% of NS               | 80% of NS | 120% of NS | 100% of NS                      | 80% of NS | 120% of NS | 100% of NS               | 80% of NS | 120% of NS | 100% of NS                      | 80% of NS | 120% of NS |
| 1           | 100.20                   | 99.11     | 97.53      | 100.24                          | 79.75     | 116.55     | 107.46                   | 107.08    | 118.02     | 100.58                          | 93.11     | 122.70     |
| 2           | 93.35                    | 86.18     | 97.22      | 97.61                           | 78.10     | 110.48     | 100.43                   | 97.38     | 102.78     | 103.45                          | 85.55     | 124.73     |
| 3           | 103.24                   | 103.66    | 105.78     | 102.06                          | 80.86     | 117.95     | 101.13                   | 88.37     | 105.95     | 107.47                          | 85.90     | 121.73     |
| 4           | 98.11                    | 99.05     | 98.56      | 95.94                           | 84.04     | 114.94     | 101.50                   | 108.47    | 109.77     | 96.04                           | 78.73     | 116.01     |
| 5           | 97.38                    | 94.82     | 93.74      | 105.28                          | 82.46     | 119.42     | 103.89                   | 101.72    | 111.28     | 99.31                           | 82.87     | 112.60     |
| 6           | 99.30                    | 101.64    | 99.44      | 101.55                          | 82.11     | 117.96     | 99.55                    | 87.96     | 102.10     | 98.08                           | 78.74     | 118.71     |
| 7           | 96.16                    | 92.25     | 92.44      | 97.78                           | 79.11     | 111.05     | 100.67                   | 98.53     | 106.66     | 101.40                          | 86.94     | 122.49     |
| 8           | 98.71                    | 93.17     | 97.98      | 99.36                           | 85.94     | 120.39     | 100.20                   | 97.33     | 106.69     | 101.16                          | 81.58     | 119.65     |
| 9           | 98.90                    | 97.43     | 96.78      | 99.48                           | 78.95     | 120.90     | 104.44                   | 107.82    | 118.73     | 98.60                           | 78.47     | 116.91     |
| Mean        | 98.37                    | 96.37     | 97.72      | 99.92                           | 81.26     | 116.63     | 102.14                   | 99.41     | 109.11     | 100.68                          | 83.54     | 119.50     |
| SD          | 2.73                     | 5.36      | 3.77       | 2.79                            | 2.60      | 3.80       | 2.59                     | 7.74      | 6.00       | 3.34                            | 4.86      | 3.85       |
