# Supplementary material for: The effect of experience in movement coordination with music on polyrhythmic production: Comparison between artistic swimmers and water polo players during eggbeater kick performance
Source: PubMed Central journal article supplement (PMC7447008; doi:10.1371/journal.pone.0238197), 2020-08-25
Supplement: pone.0238197.s003.pdf [file pone.0238197.s003.pdf]

S3 Table. Eggbeater kick and circular arm movement frequency in task2: Normal-fast-slow task

| Participant | Artistic swimmers        |            |           |                                 |            |           | Water polo players       |            |           |                                 |            |           |
|-------------|--------------------------|------------|-----------|---------------------------------|------------|-----------|--------------------------|------------|-----------|---------------------------------|------------|-----------|
|             | Eggbeater kick frequency |            |           | Circular arm movement frequency |            |           | Eggbeater kick frequency |            |           | Circular arm movement frequency |            |           |
|             | 100% of NS               | 120% of NS | 80% of NS | 100% of NS                      | 120% of NS | 80% of NS | 100% of NS               | 120% of NS | 80% of NS | 100% of NS                      | 120% of NS | 80% of NS |
| 1           | 95.17                    | 94.80      | 98.02     | 99.97                           | 117.78     | 80.92     | 110.40                   | 119.48     | 110.08    | 104.41                          | 119.94     | 88.46     |
| 2           | 97.30                    | 95.37      | 96.76     | 97.61                           | 116.64     | 79.43     | 101.33                   | 99.23      | 98.20     | 98.56                           | 113.00     | 80.34     |
| 3           | 103.62                   | 104.18     | 104.75    | 103.42                          | 119.88     | 80.89     | 98.83                    | 112.56     | 81.76     | 98.28                           | 114.34     | 83.11     |
| 4           | 101.85                   | 101.33     | 101.09    | 97.59                           | 116.64     | 81.79     | 100.69                   | 112.63     | 105.65    | 97.72                           | 122.11     | 79.19     |
| 5           | 102.90                   | 99.34      | 96.23     | 100.84                          | 122.92     | 82.20     | 99.69                    | 108.67     | 109.66    | 101.58                          | 115.41     | 82.00     |
| 6           | 90.20                    | 90.65      | 89.47     | 96.76                           | 121.64     | 78.36     | 102.39                   | 108.82     | 99.26     | 97.13                           | 117.66     | 82.13     |
| 7           | 90.45                    | 87.84      | 93.94     | 98.17                           | 113.91     | 80.46     | 103.40                   | 109.76     | 100.82    | 96.33                           | 119.64     | 79.69     |
| 8           | 100.07                   | 94.49      | 89.31     | 99.09                           | 121.18     | 80.91     | 98.75                    | 104.07     | 102.58    | 101.10                          | 116.45     | 82.84     |
| 9           | 100.65                   | 98.96      | 99.93     | 100.17                          | 119.79     | 82.97     | 98.67                    | 119.55     | 116.24    | 98.81                           | 117.48     | 80.22     |
| Mean        | 98.02                    | 96.33      | 96.61     | 99.29                           | 118.93     | 80.88     | 101.57                   | 110.53     | 102.69    | 99.32                           | 117.34     | 82.00     |
| SD          | 5.10                     | 5.17       | 5.13      | 2.07                            | 2.89       | 1.39      | 3.71                     | 6.58       | 9.80      | 2.56                            | 2.90       | 2.80      |

|
