# Supplementary material for: The effect of experience in movement coordination with music on polyrhythmic production: Comparison between artistic swimmers and water polo players during eggbeater kick performance
Source: PubMed Central journal article supplement (PMC7447008; doi:10.1371/journal.pone.0238197), 2020-08-25
Supplement: pone.0238197.s004.pdf [file pone.0238197.s004.pdf]

S4 Table. Coefficient of variation of circular arm movement range of motion

|      | Artistic swimmers |            |            | Water polo players |            |            |
|------|-------------------|------------|------------|--------------------|------------|------------|
|      | 80% of NS         | 100% of NS | 120% of NS | 80% of NS          | 100% of NS | 120% of NS |
| 1    | 5.03              | 2.68       | 4.66       | 5.03               | 4.92       | 5.41       |
| 2    | 3.31              | 1.59       | 2.97       | 3.31               | 6.29       | 3.87       |
| 3    | 12.61             | 13.03      | 15.34      | 12.61              | 3.59       | 4.13       |
| 4    | 6.21              | 4.69       | 7.68       | 6.21               | 5.16       | 5.87       |
| 5    | 17.58             | 6.34       | 6.83       | 17.58              | 11.47      | 11.43      |
| 6    | 5.18              | 1.75       | 2.36       | 5.18               | 3.63       | 10.40      |
| 7    | 6.77              | 3.43       | 1.61       | 6.77               | 4.73       | 4.98       |
| 8    | 6.54              | 2.67       | 2.27       | 6.54               | 8.05       | 4.49       |
| 9    | 5.03              | 2.41       | 2.53       | 5.03               | 4.92       | 5.41       |
| Mean | 7.41              | 4.29       | 5.14       | 7.41               | 5.71       | 6.06       |
| SD   | 4.69              | 3.61       | 4.38       | 4.69               | 2.61       | 2.84       |
